# Supplementary material for: New chromone based photoinitiators for polymerization reactions under visible light
Source: Royal Society of Chemistry journal article supplement (doi:10.1039/c3py00536d), 2013-01-01

## SUPPORTING INFORMATION:

### Size exclusion chromatography experiments:

The number average molecular weights ( $M_n$ ) and polydispersity index ( $PDI=M_w/M_n$ ) were determined by size exclusion chromatography SEC using a Waters 515 HPLC pump equipped with 2 columns (PSS SDV LINEAR M 5  $\mu$ m), and two detectors: UV/visible (Waters 486) and DRI (Waters 2414). Measurements were performed in tetrahydrofuran THF at room temperature, with a flow rate of 1 mL.min<sup>-1</sup>. Toluene was used as a flow rate marker. Calibration was based on polystyrene standards (kit EasyCal from Polymer Laboratories  $M_n$  between 580 - 377,400 g.mol<sup>-1</sup>) and Mark-Houwink parameters (PS  $K = 11.4 \times 10^{-3}$  mL.g<sup>-1</sup>,  $\alpha = 0.716$ ; PBA  $K = 12.2 \times 10^{-3}$  mL.g<sup>-1</sup>,  $\alpha = 0.70$ ).[1]

For the **CH\_1**/MDEA/R-Br photoinitiating system upon halogen lamp exposure in lauryl acrylate, a polymer characterized by  $M_n$  of 34,000 g.mol<sup>-1</sup> and a PDI of 3.3 has been observed.

[1] Beuermann, S.; Paquet, D. A.; McMinn, J. H.; Hutchinson, R. A. *Macromolecules* **1996**, 29, 4206-4215.

**Figure S1.** (A) Cyclic voltammogram of **CH\_1** in acetonitrile. (B) (a) Absorption and (b) fluorescence spectra of **CH\_2** in acetonitrile.

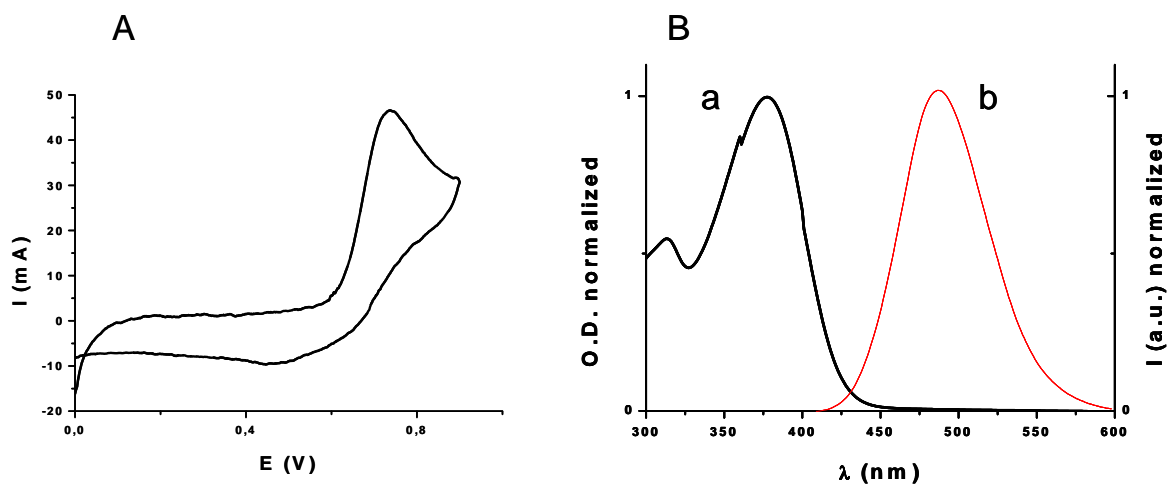

**Figure S2.** fluorescence spectra of **CH\_1** in TMPTA and EPOX.

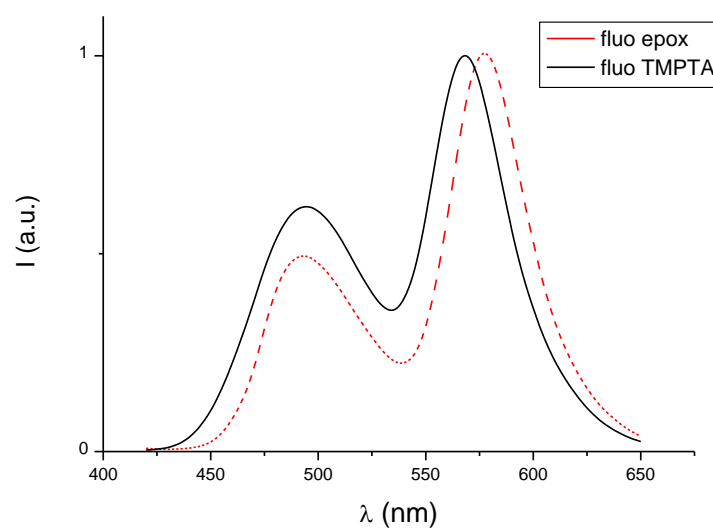

**Figure S3.** Fluorescence spectra (normalized to 1.0 for T\*) in the course of the polymerization of a TMPTA/EPOX blend; initiating system **CH<sub>1</sub>**/Iod/NVK (see text).

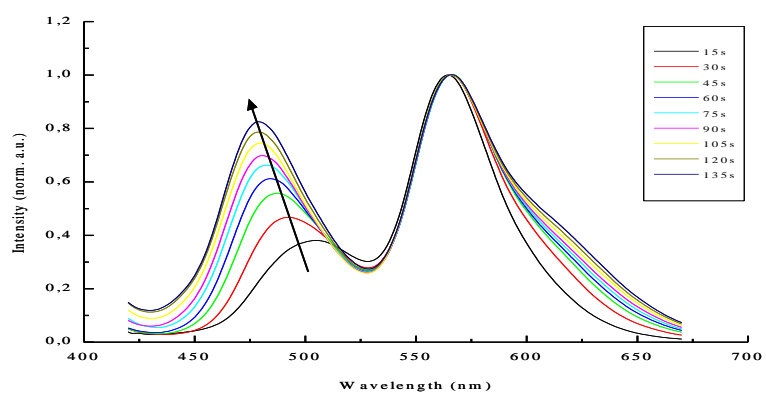

Supplement: c3py00536d.pdf [file c3py00536d.pdf]
